# Supplementary material
Source: Springer Nature journal article supplement (https://www.springerprofessional.de/resource/supplementary/13638_2011_356_MOESM9_ESM.pdf/11898110)
Supplement: MOESM9 [file 11898110]

/\* Assign the High (H) and Low (L) threshold values of the five-branches comb for the five DVFI groups of P packets.\*/

$th_H[1,2,3,4,5] = \{25, 30, 35, 40, 45\}$

$th_L[1,2,3,4,5] = \{10, 17, 24, 31, 38\}$

while (a video packet arrives)

{

if (packet\_type == 'I')

/\* Merged thresholds of the Step Function for I packets. \*/

threshold<sub>high</sub> = maximum\_AC[2]\_buffer\_size - 1

threshold<sub>low</sub> = maximum\_AC[2]\_buffer\_size - 1

elseif (packet\_type == 'P')

/\* high and low thresholds according to DVFI grouping. \*/

switch DVFI {

case(DVFI belongs to group\_1):

threshold<sub>high</sub> =  $th_H[1]$

threshold<sub>low</sub> =  $th_L[1]$

case(DVFI belongs to group\_2):

threshold<sub>high</sub> =  $th_H[2]$

threshold<sub>low</sub> =  $th_L[2]$

case(DVFI belongs to group\_3):

threshold<sub>high</sub> =  $th_H[3]$

threshold<sub>low</sub> =  $th_L[3]$

case(DVFI belongs to group\_4):

threshold<sub>high</sub> =  $th_H[4]$

threshold<sub>low</sub> =  $th_L[4]$

case(DVFI belongs to group\_5):

threshold<sub>high</sub> =  $th_H[5]$

threshold<sub>low</sub> =  $th_L[5]$

}

end

DVFI\_CQM(packet\_type, threshold<sub>low</sub>, threshold<sub>high</sub>)

}

void DVFI\_CQM(packet\_type, threshold<sub>low</sub>, threshold<sub>high</sub>) {

if (length(AC[2]) < threshold<sub>low</sub>)

video packet → AC[2]

elseif (length(AC[2]) < threshold<sub>high</sub>)

if (packet\_type == 'I')

video packet → AC[2]

else

$Prob_{transition} = \left\{ \frac{length(AC[2]) - threshold_{low}}{threshold_{high} - threshold_{low}} \right\}^2$

rn = uniform(0,1)

if (rn > prob<sub>transition</sub>)

video packet → AC[2]

else

Min\_Delay()

end

end

else

Min\_Delay()

end

}

void Min\_Delay() {

if (AC[0] has a shorter queue delay than AC[1])

video packet → AC[0]

else

video packet → AC[1]

end

}
